# Supplementary material for: Historical and current distribution and movement patterns of large herbivores in the Limpopo National Park, Mozambique
Source: Frontiers journal article supplement (doi:10.3389/fevo.2022.978397), 2022-09-09
Supplement: Data_Sheet_1.doc [file Data_Sheet_1.doc]

Supplementary Material

# Supplementary Tables

Table S1. Some examples of passages in the early literature that refer to large herbivores occurrence in the Greater Limpopo Transfrontier Park

| **date** | **Location** | **Excerpt** | **Source** | **Pages** |
| --- | --- | --- | --- | --- |
| 1860 | Northwest of Limpopo National Park (LNP) | “…The moment I arrived I saw Manova and the hunter Macindana coming along, each bringing the tail of a buffalo which he had killed, fastened to their muskets. The hunter Maxotil had killed a zebra, and Mabana, a tuongonlie….” “They ate the insides of all the five animals, and the whole of the zebra…”(Das Neves, 1879) | Primary | 46-48 |
| 1860 | Northwest of LNP | “…Maxotil and the hunters returned in the afternoon with the carriers bringing the three buffaloes, part of the rhinoceros and part of the giraffe….”(Das Neves, 1879) | Primary | 70 |
| 1860 | Northwest of LNP | “…The number of elephants killed amounted to fifty-five. The tusks were all despatched to the house of Senhor Albazini…”(Das Neves, 1879) | Primary | 124 |
| 1861 | Northeast of LNP | “...On coming close to the place, a buffalo suddenly sprang out from among the tall reeds, and escaping along the bank, up the river (Letaba River), crossed over…”(Das Neves, 1879) | Primary | 213 |
| 1862 | Northeast of LNP | “…resting only for a short time during the day near a waterfall of the river Imbelule… And in truth they were not far distant, for we soon came upon a herd of five buffaloes”(Das Neves, 1879). | Primary | 228-229 |
| 1870 | LNP river | “…During 1870, both the white rhino and the black rhino were reported west of the Limpopo River, between its confluences with the Elefantes and Nuanetsi Rivers…” (Dunham, 2004) |  |  |
| 1872 | Northeast and Southeast of LNP | “……noted the presence of white rhino west of the Limpopo River, between the confluence of the Limpopo and Elefantes Rivers, and the confluence of the Limpopo and Nuanetsi Rivers (Dunham, 2004) | Secondary | 4 |
| 1930s | LNP | Location of large-scale hunting in the Lourenço Marques District in the 1930s (present-day Limpopo National Park) (Martinho, 1934) | Primary | 4-23 |
| 1953 | East of LNP | “…*Lododonta africana* distributions …commoner north of the Olifants River; Shingwedzi, Letaba……Portuguese East Africa…. Southern Rhodesia”(Ellerman et al., 1953) | Primary | 156 |
| 1953 | East of LNP | “…*Equus burchelli* distributions: Transvaal, where it is widely distributed (Punda Maria,- Shingwedzi, Letaba, Satara, Skukuza, Pretorius Kop, Toulon, etc…Southern Rhodesia... parts of Portuguese East Africa”(Ellerman et al., 1953) | Primary | 166 |
| 1953 | South of LNP | “…*Connochaetes taurinus* distribution: Shingwedzi, Satara, Skukuza, Pretorius Kop, Toulon, etc. Very common south of the Olifants River). Zululand…Southern Rhodesia ….Southern Portuguese East Africa”(Ellerman et al., 1953) | Primary | 205 |
| 1953 | Western LNP | “…*Tragelaphus oryx* distribution: North of the Olifants River, and in the Giants Castle Reserve, Natal. Parts of Southern Rhodesia, and western Portuguese East Africa...”(Sealous, 1908) | Primary | 210 |
| 1953 | East of LNP | “…*Syncerus caffer* distribution: Transvaal (districts of Shingwedzi, near Crocodile River in the Skukuza region where it occurs in large numbers), Toulon, etc… Southern Rhodesia… …Portuguese East Africa, recorded from districts of Gazaland…”(Ellerman et al., 1953) | Primary | 211 |
| 1958 | Northeast of LNP | “…Buffalos along the Nuanetsi river about 10 miles from the Portuguese border; along the Limpopo and Bubye river…” (Fraser, 1958) | Secondary | 256 |
| 1964 | South LNP (Sengwe corridors), Nuanetsi river | “…Buffalos are most numerous in the south east,…The latter may be buffalo which enter the territory from Portuguese East Africa…”(Child and Savory, 1964) | Primary | 13 |
| Early 1970s | Between the Limpopo River and KNP | “…By the early 1970s white rhino had been eliminated from most of its former range, and the few surviving animals were restricted to the area between the Limpopo River and Kruger National Park (KNP) on the South African border…” (Dunham, 2004) | Primary | 98 |
| 1970s | North and South of LNP | The location of distribution of white rhinos in Mozambique (present-day LNP) in the 1970s (Dunham, 2004) | Secondary | 7 |

Table S2. Some examples of passages in the early literature that mention, or allude to movement behavior by large herbivores in the Greater Limpopo Transfrontier Park

| **Date** | **Direction of movement** | **Excerpt** | **Source** | **Pages** |
| --- | --- | --- | --- | --- |
| 1900s | From KNP to LNP | “…In 1905 the Sabi Game Reserve and Shingwidzi Reserve (KNP) had only 10 elephants but the number grew in 1912 to 25 elephants as results of immigration from adjoining Portuguese East Africa (Mozambique)…”(Pienaar et al., 1966) | Secondary | 1 |
| 1902 | From KNP to LNP | “…Game (elephants, rhinos and elands) movements from areas bordering Mozambique (current southeast of Limpopo National Park) and Rhodesia [current Gonarezhou National Park (GNP)] to Shingwitsi and Sabi game reserve (current Kruger National Park) in 1902…” (Mavhunga and Spierenburg, 2009) | Primary | 46-47 |
| 1903 | From KNP to LNP | “The recolinization of KNP by elephants from Mozambique (present-day Limpopo National Park) after the arrival of the first warden in 1903 through Olifant’s River” (Whyte et al., 2003) | Secondary | 337 |
| 1900-1945 | From LNP to KNP | “…Figure 16.1 shows the recolonization of Kruger by elephants, giraffe, eland…..Northward colonization took until 1945……Southward was slightly slower, taking until 1958…”(Whyte et al., 2003) | Secondary | 337 |
| 1950-1970 |  | “…Elephant numbers increased rapidly from perhaps 50 to over 1000 in 1959, to nearly 9000 in 1970, due largely to immigration from Mozambique…”(Walker et al., 1987) | Primary | 385 |
| 1960-1967 | From LNP to KNP | “…immigration from Mozambique probably contributed to dramatic increase of elephant population between 1960 and 1967”(Whyte et al., 2003) | Secondary | 336 |
| 1964 | From KNP to LNP and vice-versa | “Temporary or permanent immigration from Portuguese East Africa and even Southern Rhodesia, could likewise have added to the increase”(Pienaar et al., 1966)  “Two elephants herds of 42 and 34, respectively, were seen during March, to enter KNP from Portuguese East Africa at Kalabyene Spruit in the Lebombo Mountains”(Pienaar et al., 1966)  “The possibility is not excluded that in consequence of severe drought, a considerable number of immigrant elephant entered the park (KNP) from adjoining sandveld, leaving again after sufficient rain had fallen (cf i.a 86 bulls elephant counted at Pafuri during the census)”(Pienaar et al., 1966) | Primary | 43 |
| 1964 | From Southern Rhodesia and Mozambique | “….but the surplus male animals represents an influx of nomadic elephant bulls over the year from Southern Rhodesia (cf. Pafuri) and Mozambique (cf. the Lebombo Flats” (Whyte et al., 2003) | Primary | 35 |
| 1964-1969 | Along LNP western border | White rhinos re-population movements from Kruger National Park to Limpopo National Park between 1964 and 1969 (Pienaar, 1970) |  |  |
| 1976 | From LNP to KNP | “After the isolation of park (KNP) through fencing in 1976, this rate (7.5% per year) declined to 6.6%, suggesting that elephant population growth may have been enhanced by immigration from Mozambique”(Whyte et al., 2003) | Primary | 338 |
| 2003 | LNP – KNP border | The eastern boundary fence of KNP prevented the movement of rhinos from the mid- 1970s until the end of the 20th century, but within the last few years, white rhinos have again moved from KNP into LNP, crossing the international border either through a 14-15 km gap that was deliberately opened in the fence during 2003, or through gaps where the border fence crosses rivers and floodwaters have recently damaged the fence (Dunham, 2004) | Primary | 4 |
| 2008-2013 | LNP to GNP | Movements of buffalos from KNP to GNP between 2008 and 2013 in the GLTP (Caron et al., 2016). | Primary | 278 |
| 2018 | From KNP to LNP and vice-versa | Movements of elephants from KNP to LNP and vice versa between 2002 and 2014 (Purdon et al., 2018) | Primary | 5 |

**References**

Caron, A., Cornelis, D., Foggin, C., Hofmeyr, M., and de Garine-Wichatitsky, M. (2016). African Buffalo Movement and Zoonotic Disease Risk across Transfrontier Conservation Areas, Southern Africa. *Emerg. Infect. Dis.* 22, 277–280. doi: 10.3201/eid2202.140864

Child, G., and Savory, C.R. (1964). The distribution of large mammal species in southern Rhodesia. *Arnoldia Rhod*. 1, 1–18.

Das Neves, D.F. (1879). *A hunting expedition to the Transvaal*. George Bell & Sons, London.

Dunham, K.M. (2004). *Appraisal of the potential for Rhino conservation in Mozambique*. Harare: SADC Regional Programme for Rhino Conservation.

Ellerman, J.R., Morrison-Scott, T.C.S., and Hayman, R.W. (1953). *Southern African mammals 1758 to 1951: a reclassification*. London: Natural History Museum Library.

Fraser, A.D. (1958). On the present status of ungulates in southern Rhodesia. *Mammalia* 22, 469–475.

Martinho, J.P. (1934). Colônia de Moçambique: a caça. Lourenço Marques: Imprensa Nacional.

Mavhunga, C., and Spierenburg, M. (2009). Transfrontier Talk, Cordon Politics: The Early History of the Great Limpopo Transfrontier Park in Southern Africa, 1925–1940. *J. South. Afr. Stud*. 35, 715–735. doi: 10.1080/03057070903101920

Pienaar, U.De V.; van Wyk, P.; Fairall, N. (1966). An Aerial Census of Elephant and Buffalo in the Kruger National Park and the Implication Thereof on Intended Management Schemes. *Koedoe*, 9, 40–167, doi:doi.org/10.4102/koedoe.v9i1.781.

Pienaar, U. de V. (1970). The recolonisation history of the square-lipped (white) rhinoceros *Ceratotherium simum simum* (Burchell) in the Kruger National Park (October 1961 - November 1969). *Koedoe* 13, 157–169.

Purdon, A. Mole, M.A., Chase, M.J., van Aarde, R.J. (2018). Partial migration in savanna elephant populations distributed across southern Africa. *Sci. Rep*. 8, 11331. doi: 10.1038/s41598-018-29724-9

Sealous, F.C. (1908). *African nature notes and reminiscences*. 1st ed. London: London: Macmillan and Co.

Walker, B.H., Emslie, R.H., Owen-Smith, R.N., and Scholes, R.J. (1987). To Cull or Not to Cull: Lessons from a Southern African Drought. *J. Appl. Ecol.* 24, 381–401. doi: 10.2307/2403882

Whyte, I.J., van Aarde, R,J., and Pimm, S.L. (2003). "Kruger’s Elephants Population: Its Size and Consequences for Ecosystem Heterogeneity," in The Kruger Experience: Ecology and Management of Savanna Heterogeneity, ed. J.T. du Toit., K.K. Rogers, and H.C. Biggs (Washington, Island Press), 333–344.
